# Supplementary material for: PTP10D-mediated cell competition is not obligately required for elimination of polarity-deficient clones
Source: PubMed Central journal article supplement (PMC9672856; doi:10.1242/bio.059525), 2022-11-10
Supplement: biolopen-11-059525-s1.pdf [file biolopen-11-059525-s1.pdf]

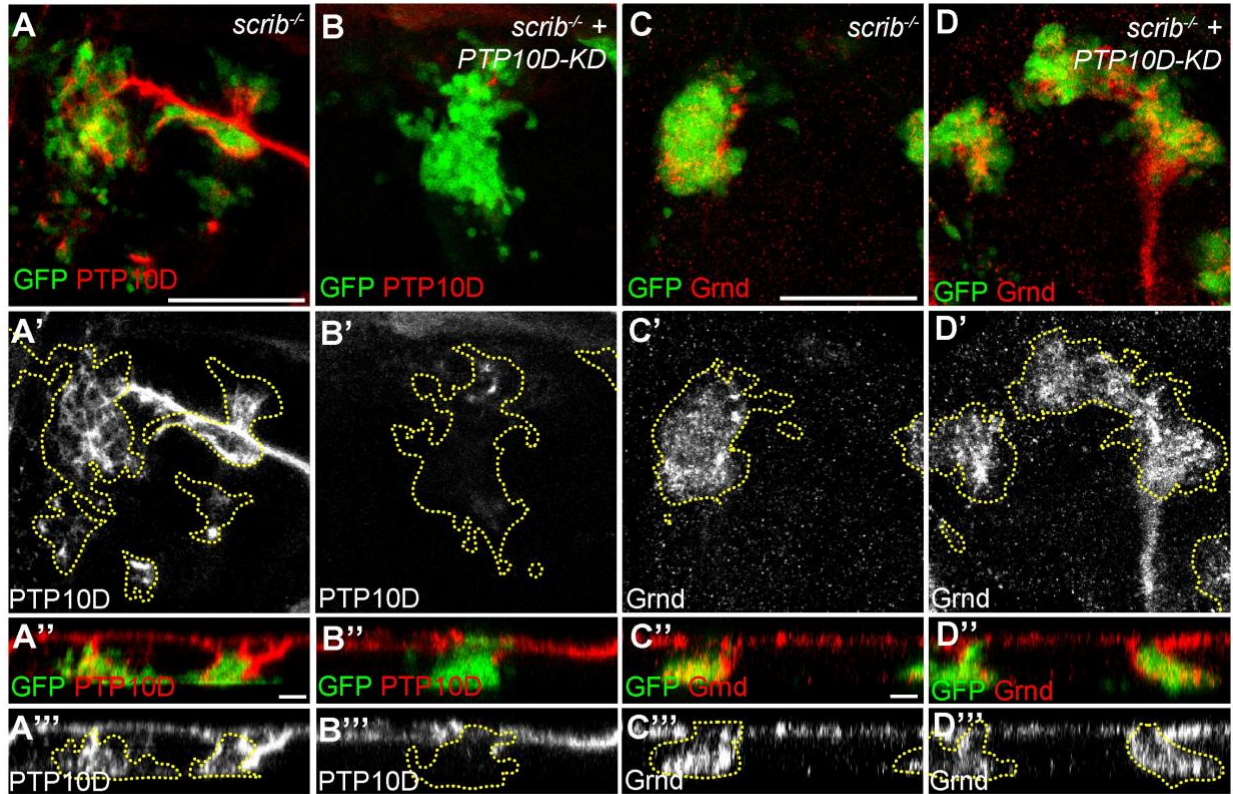

SFig 1

**Fig. S1. PTP10D depletion efficiently ablates PTP10D protein from *scrib* clones**

**(A-B):** *scrib* clones in the eye disc show mislocalization of PTP10D (A), while *scrib* clones expressing *PTP10D-KD* are depleted of PTP10D protein (B). A'', A''' as well as B'', B''' show X-Z cross sections of A and B respectively.

**(C-D):** *scrib* clones (C) as well as *scrib* clones expressing *PTP10D-KD* (D) in the eye disc show mislocalization of Grnd. C'', C''' as well as D'', D''' show X-Z cross sections of C and D respectively. Scale bars 50  $\mu\text{m}$  in A, and C, 10  $\mu\text{m}$  in A'', and C''.

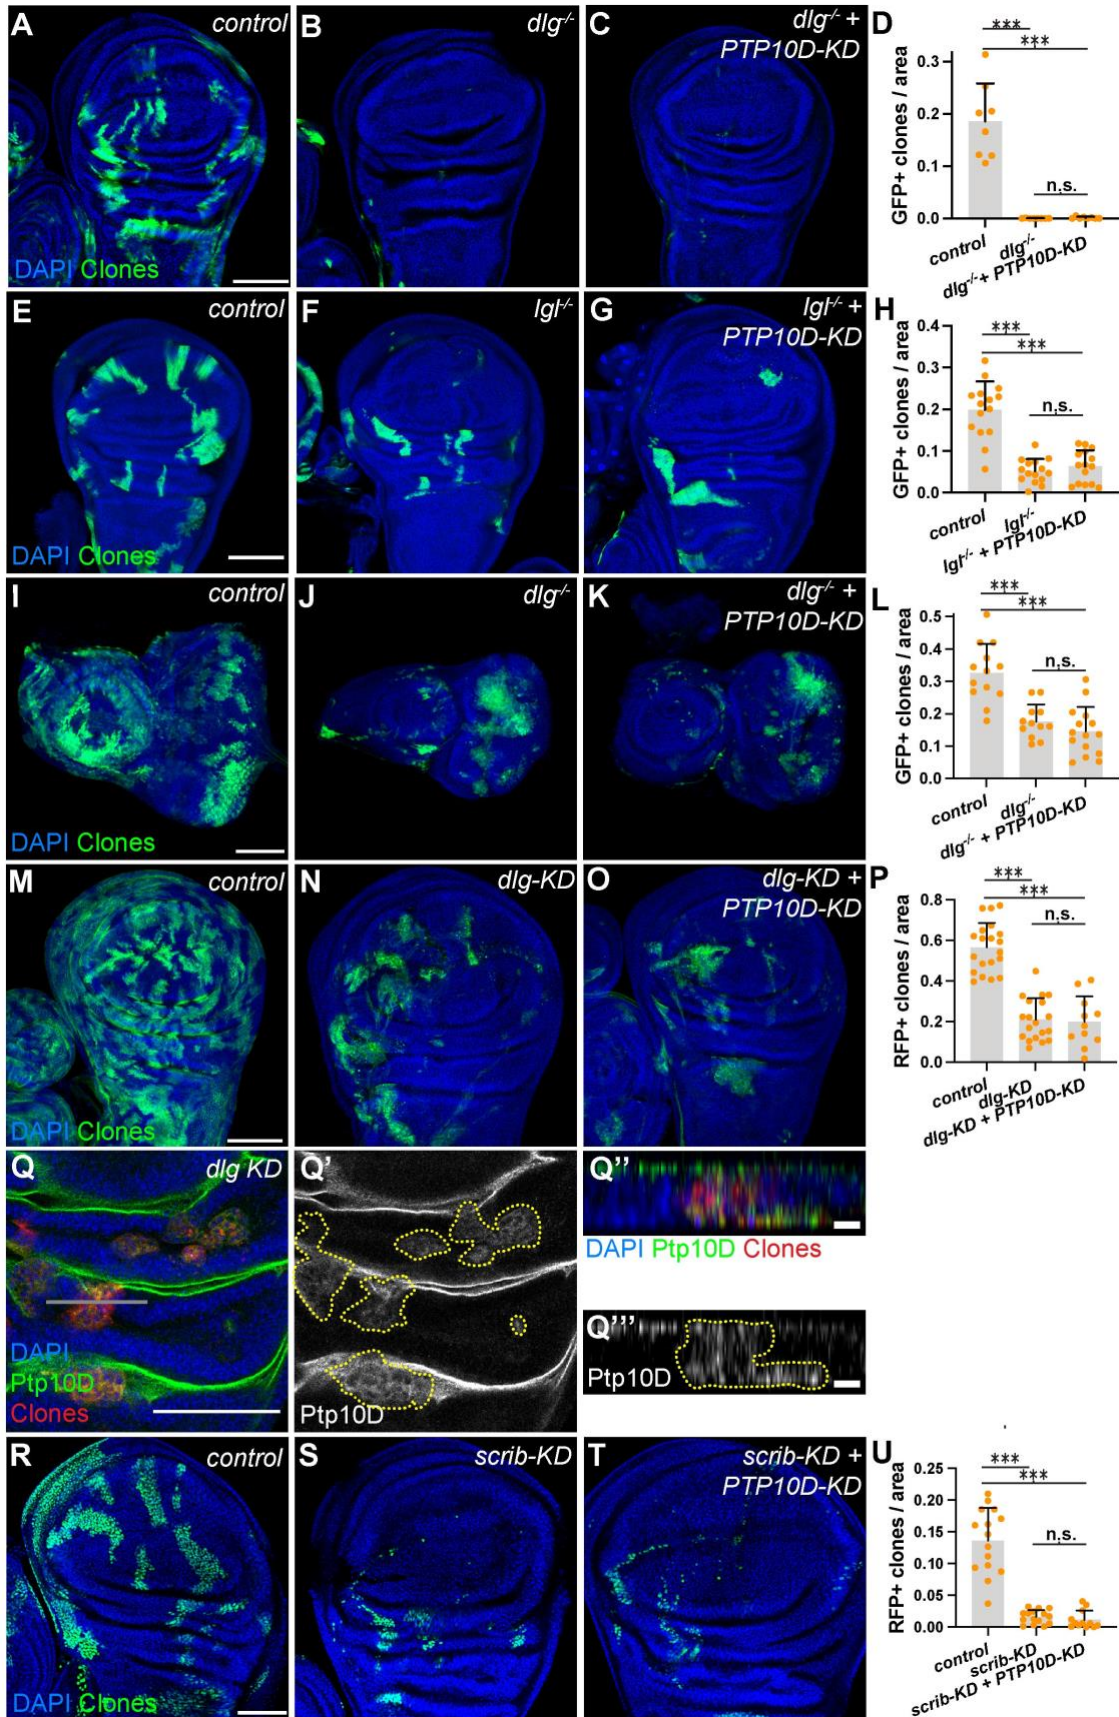

SFig 2

**Fig. S2. Co-depletion of *scrib* class genes and PTP10D**

**(A-D):** *dlg* mutant clones in the wing disc undergo cell elimination (B; control in A) even when PTP10D is co-depleted (C). Quantitation in D (mean±s.d., one-way ANOVA test, n=8 for control, n=8 for *dlg*, n=8 for *dlg+PTP10D-KD*).

**(E-H):** *lgl* mutant clones in the wing disc undergo cell elimination (F; control in E) even when PTP10D is co-depleted (G). Quantitation in H (mean±s.d., one-way ANOVA test, n=15 for control, n=15 for *lgl*, n=15 for *lgl+PTP10D-KD*).

**(I-L):** *dlg* mutant clones in the eye disc undergo cell elimination (J; control in I) even when PTP10D is co-depleted (K). Quantitated in L (mean±s.d., one-way ANOVA test, n=13 for control, n=12 for *dlg*, n=15 for *dlg+PTP10D-KD*).

**(M-Q):** *Dlg*-depleted clones in the wing disc undergo cell elimination (N; control in M) even when PTP10D is co-depleted (O). Quantitation in P (mean±s.d., one-way ANOVA test, n=20 for control, n=19 for *dlg-KD*, n=11 for *dlg-KD+PTP10D-KD*). *dlg-KD* clones in the wing disc show PTP10D mislocalization (Q). Q'' shows a X-Z cross section of magnified area of Q (marked in Q by grey line).

**(R-U):** *Scrib*-depleted clones in the wing disc undergo cell elimination (S; control in R) even when PTP10D is co-depleted (T). Quantitation in U (mean±s.d., one-way ANOVA test, n=15 for control, n=15 for *scrib-KD*, n=12 for *scrib-KD+PTP10D-KD*).

All wing discs are oriented with their ventral side up and anterior side left. Scale bars 100 µm in A, E, I, M, and R, 50 µm in Q, 10 µm in Q'', and Q'''. Statistical significance is indicated with \* p≤0.05, \*\*p≤0.01, \*\*\*p≤0.001, and \*\*\*\* p≤0.0001.

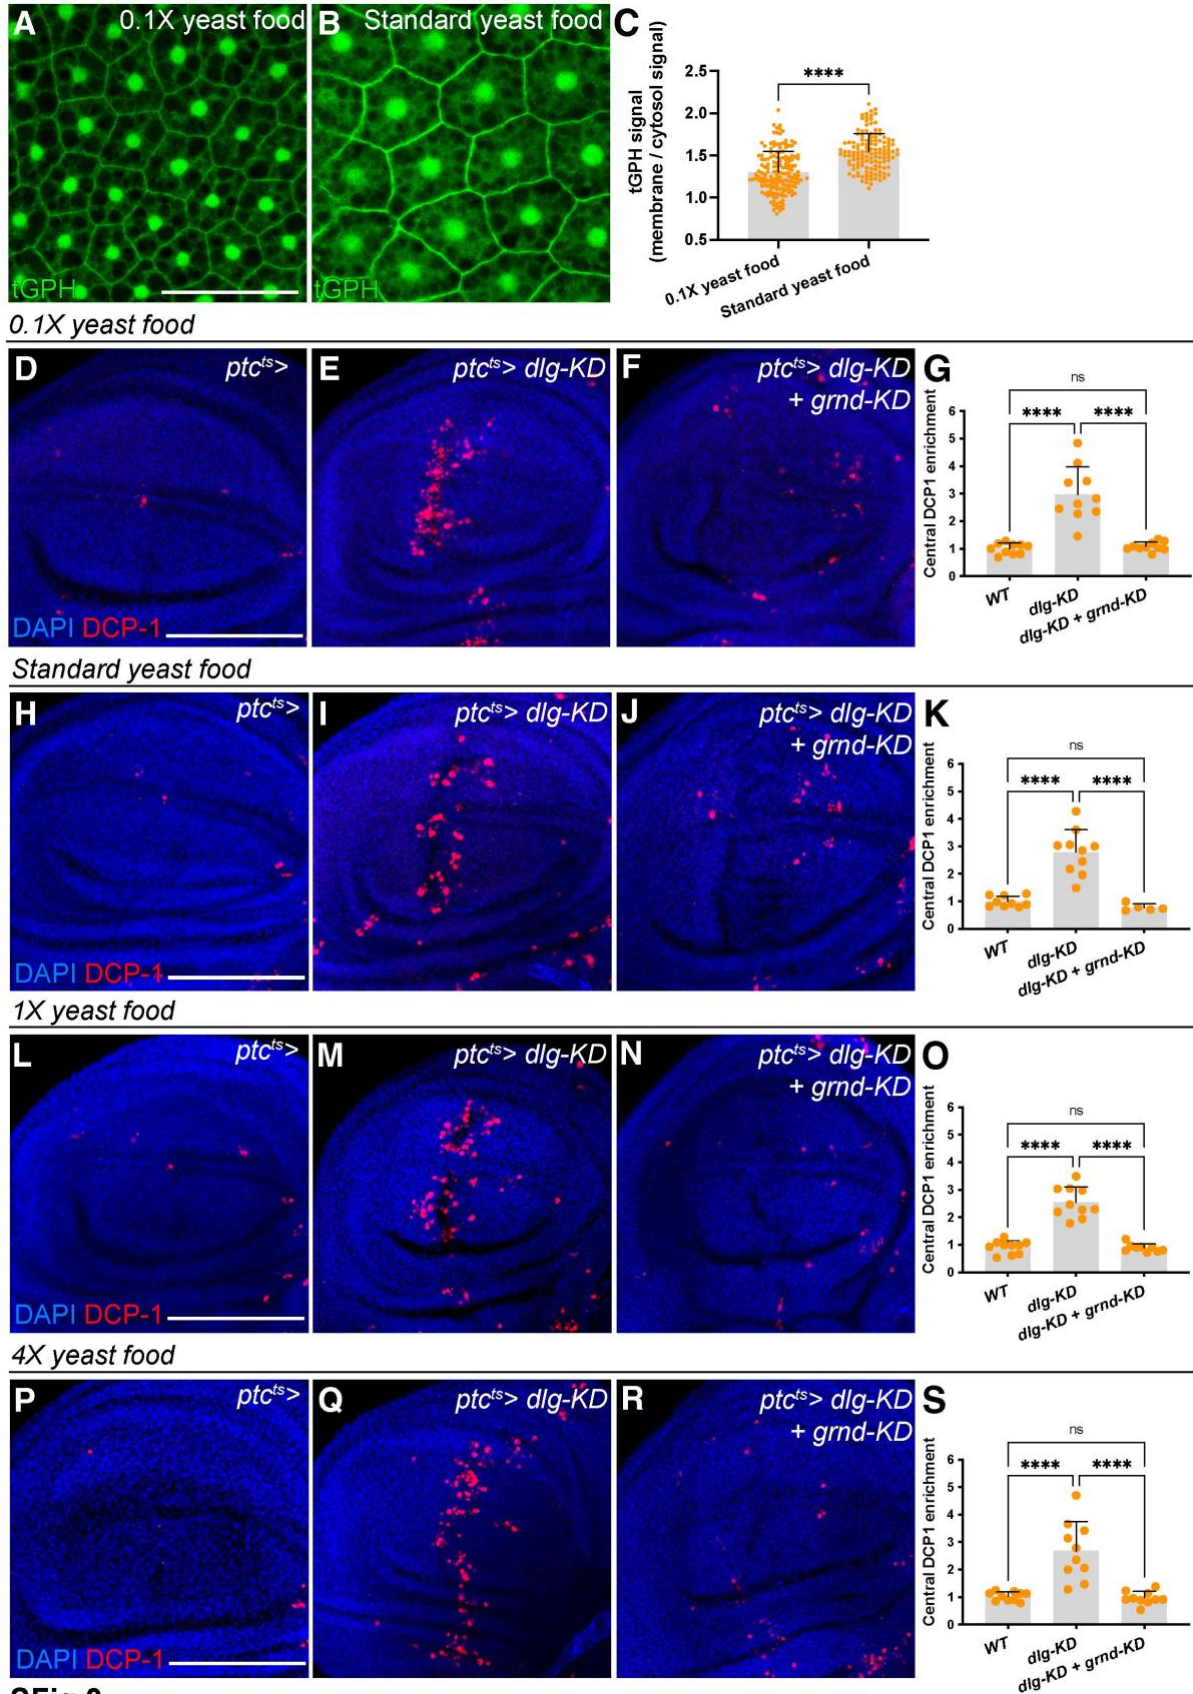

SFig 3

**Fig. S3. Polarity-deficient cell elimination is entirely dependent on Grnd**

**(A-C):** Insulin signaling, assayed by tGPH (green, comparison of plasma membrane and cytosolic levels) is reduced on low protein 0.1X yeast food (A) compared to standard food following the recipe of Sanaki et al. (B). Quantitated in C (mean±s.d., unpaired t-test, n=160 for 0.1X yeast food, n=130 for Standard yeast food).

**(D-S):** Polarity-deficient cells, generated through *ptc-Gal4*-driven *dlg* depletion, induce apoptosis along the A-P boundary on low protein 0.1X yeast food (E; control in D), standard food (I; control in H), 1X yeast food (M; control in L), and high protein 4X yeast food (Q; control in P). Elimination of polarity-deficient cells is entirely dependent on Grnd and *grnd* depletion inhibits apoptosis along the A-P boundary on tested foods (F, J, N, R). Quantitated in G (mean±s.d., one-way ANOVA test, n=10 for WT, n=10 for *dlg-KD*, n=10 for *dlg-KD+grnd-KD*), K (mean±s.d., one-way ANOVA test, n=9 for WT, n=10 for *dlg-KD*, n=5 for *dlg-KD+grnd-KD*), O (mean±s.d., one-way ANOVA test, n=10 for WT, n=10 for *dlg-KD*, n=9 for *dlg-KD+grnd-KD*), S (mean±s.d., one-way ANOVA test, n=10 for WT, n=10 for *dlg-KD*, n=10 for *dlg-KD+grnd-KD*).

Scale bars 100 μm in A, D, H, L, and P. Statistical significance is indicated with \*p≤0.05, \*\*p≤0.01, \*\*\*p≤0.001, and \*\*\*\* p≤0.0001.

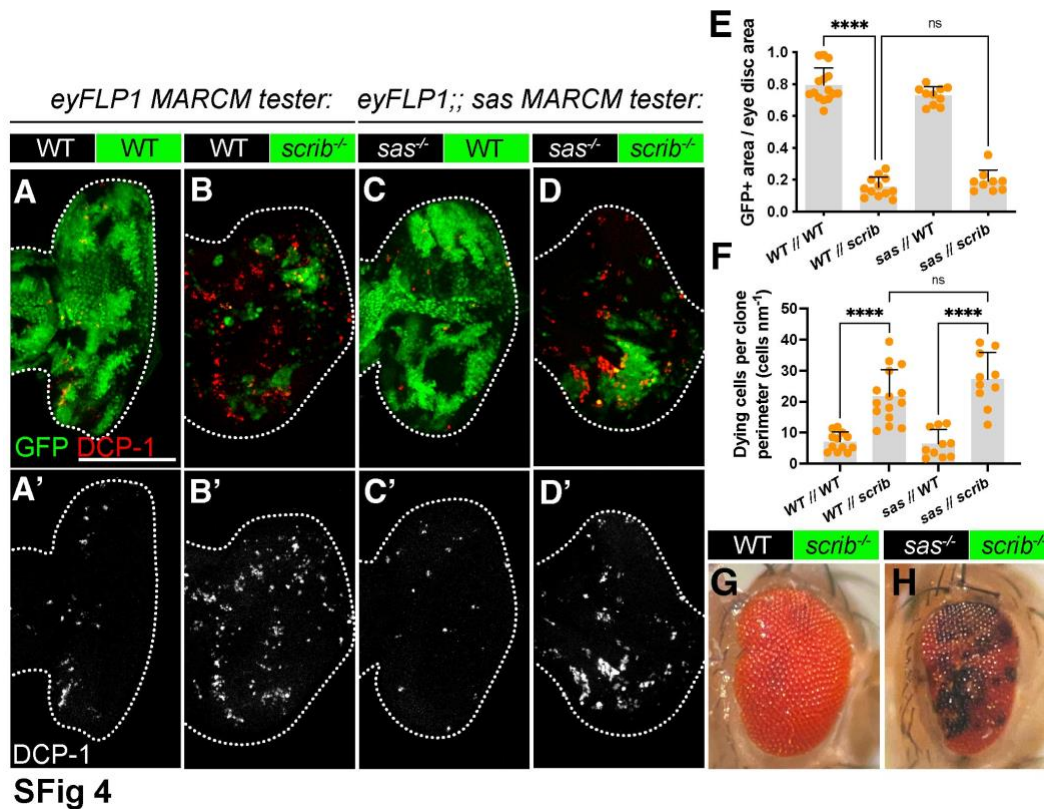

**Fig. S4. Minor effect on *scrib* clones by *sas* depletion in neighboring cells**

**(A-H):** *eyFLP1*-generated *scrib* clones are eliminated from the eye disc (B; control in A) and this is not changed when *scrib* clones are surrounded by *sas*<sup>*eld-4*</sup> null mutant cells (D; control in C). Quantitation of clone area in E (mean±s.d., one-way ANOVA test, n=15 for WT//WT, n=12 for WT//*scrib*, n=10 for *sas*//WT, n=9 for *sas*//*scrib*) and apoptosis along the clone boundary in F (mean±s.d., one-way ANOVA test, n=12 for WT//WT, n=15 for WT//*scrib*, n=10 for *sas*//WT, n=10 for *sas*//*scrib*); ‘//’ separates different genotypes of neighboring cells and clones. Adult eyes of WT//*scrib* flies show the typical rough eye phenotype (G). *sas*//*scrib* flies show melanized areas of the adult eye (H).

Scale bars 100 μm in A. Statistical significance is indicated with \*p≤0.05, \*\*p≤0.01, \*\*\*p≤0.001, and \*\*\*\* p≤0.0001.

**Table S1. Fly food Information**

| <b>Ingredient</b>       | <b>Molasses-based food</b>                            |                      | <b>Corn syrup-based food</b> |                        |                                             |
|-------------------------|-------------------------------------------------------|----------------------|------------------------------|------------------------|---------------------------------------------|
| Yeast                   | 20.08 g                                               |                      | 15.88 g                      |                        |                                             |
| Soy flour               | ----                                                  |                      | 9.18 g                       |                        |                                             |
| Cornmeal                | 74.15 g                                               |                      | 67.06 g                      |                        |                                             |
| Molasses                | 91.45 mL                                              |                      | ----                         |                        |                                             |
| Corn syrup              | ----                                                  |                      | 70.59 mL                     |                        |                                             |
| Agar                    | 6.96 g                                                |                      | 5.29 g                       |                        |                                             |
| 10% Tegosept in Ethanol | 15.87 mL                                              |                      | 10 mL                        |                        |                                             |
| Propionic Acid          | 5.25 mL                                               |                      | 4.8 mL                       |                        |                                             |
| Water                   | Adjusted to total volume after ingredients were added |                      |                              |                        |                                             |
| Total Volume            | 1000 mL                                               |                      | 1000 mL                      |                        |                                             |
|                         |                                                       |                      |                              |                        |                                             |
| <b>Ingredient</b>       | <b>Standard food</b>                                  | <b>1X yeast food</b> | <b>4X yeast food</b>         | <b>0.1X yeast food</b> | <b>Standard food + anti-fungal reagents</b> |
| Yeast                   | 40 g                                                  | 40 g                 | 160 g                        | 4 g                    | 40 g                                        |
| Cornmeal                | 40 g                                                  | 40 g                 | 40 g                         | 40 g                   | 40 g                                        |
| Dextrose                | 16 g                                                  | ----                 | ----                         | 16 g                   | 16 g                                        |
| Agar                    | 8 g                                                   | 8 g                  | 8 g                          | 8 g                    | 8 g                                         |
| 10% Tegosept in Ethanol | ----                                                  | ----                 | ----                         | ----                   | 15 mL                                       |
| Propionic Acid          | ----                                                  | ----                 | ----                         | ----                   | 5 mL                                        |
| Water                   | Adjusted to total volume after ingredients were added |                      |                              |                        |                                             |
| Total Volume            | 1000 mL                                               | 1000 mL              | 1000 mL                      | 1000 mL                | 1000 mL                                     |

**Table S2. Key Resources**

| <b>Drosophila strains</b>                                                    | <b>Source</b>                                                         | <b>Reference</b>          |
|------------------------------------------------------------------------------|-----------------------------------------------------------------------|---------------------------|
| <i>w1118</i>                                                                 | BDSC                                                                  | BDSC #5905                |
| <i>patched-Gal4</i>                                                          | BDSC                                                                  | BDSC #2017                |
| <i>tubulin-Gal80-ts</i>                                                      | BDSC                                                                  | BDSC #7019                |
| <i>UAS-PTP10D-RNAi (III)</i>                                                 | BDSC                                                                  | BDSC #39001               |
| <i>UAS-scrib-RNAi (II)</i>                                                   | BDSC                                                                  | BDSC #39073               |
| <i>UAS-dlg-RNAi (II)</i>                                                     | BDSC                                                                  | BDSC #39035               |
| <i>UAS-Dicer2 (II)</i>                                                       | BDSC                                                                  | BDSC #24650               |
| <i>tGPH (III)</i>                                                            | BDSC                                                                  | BDSC #8164                |
| <i>PTP10D<sup>1</sup></i>                                                    | BDSC                                                                  | BDSC #5810                |
| <i>Act&gt;CD2&gt;Gal4, UAS-RFP (III)</i>                                     | BDSC                                                                  | BDSC #30558               |
| <i>hsFLP</i>                                                                 | BDSC                                                                  | BDSC #8862                |
| <i>UAS-dlg-RNAi (III)</i>                                                    | VDRC                                                                  | VDRC #41136               |
| <i>UAS-grnd-RNAi (II)</i>                                                    | VDRC                                                                  | VDRC #104538              |
| <i>eyFLP1; Act&gt;y+&gt;Gal4, UAS-GFP; FRT82b, tubulin-Gal80</i>             | Igaki lab                                                             | (Pagliarini & Xu, 2003)   |
| <i>eyFLP1; Act&gt;y+&gt;Gal4, UAS-GFP; FRT82b, sas-eld-4, tubulin-Gal80</i>  | Igaki lab                                                             | (Yamamoto et al., 2017)   |
| <i>UAS-Dicer2; eyFLP5, Act&gt;y+&gt;Gal4, UAS-GFP; FRT82b, tubulin-Gal80</i> | Igaki lab                                                             | (Yamamoto et al., 2017)   |
| <i>scrib<sup>1</sup>, FRT82b</i>                                             | Samakovlis lab in Fig. 2, 4, 5, Fig. S1; Igaki lab in Fig. 3, Fig. S4 | (Bilder & Perrimon, 2000) |
| <i>scrib<sup>1</sup>, PTP10D-RNAi, FRT82b</i>                                | Samakovlis lab                                                        | (Liu et al., 2022)        |
| <i>scrib<sup>2</sup>, FRT82b</i>                                             | Bilder lab                                                            | (Bilder & Perrimon, 2000) |
| <i>dlg<sup>m52</sup>, FRT19a</i>                                             | Perrimon lab                                                          | (Perrimon, 1988)          |
| <i>Ig<sup>27S3</sup>, FRT40a</i>                                             | Richardson lab                                                        | (Grzeschik et al., 2007)  |
| <i>FRT19a</i>                                                                | Bilder lab                                                            |                           |
| <i>FRT40a</i>                                                                | Bilder lab                                                            |                           |
| <i>FRT82b</i>                                                                | Bilder lab                                                            |                           |
| <i>hsFLP, FRT19a, tub-Gal80; Act-Gal4, UAS-GFP</i>                           | Bilder lab                                                            |                           |



| <i>UAS-GFP, hsFLP; tub-Gal80, FRT40a;</i><br><i>tub-Gal4</i> |                 | Bilder lab                                |
|--------------------------------------------------------------|-----------------|-------------------------------------------|
| <b>Antibodies</b>                                            | <b>Dilution</b> | <b>Reference</b>                          |
| Rabbit anti-DCP-1                                            | 1:100           | Cell Signaling #9578                      |
| Mouse anti-PTP10D                                            | 1:100           | DSHB #8B22F5                              |
| Mouse anti-Grnd                                              | 1:200           | Bilder lab #7D9; (de Vreede et al., 2018) |

**Table S3. Detailed Genotypes**

| Figure | Panel | Genotype                                                                                                   |
|--------|-------|------------------------------------------------------------------------------------------------------------|
| 1      | A     | <i>ptc-Gal4, tub-Gal80TS/+; UAS-dlg-RNAi/+</i>                                                             |
|        | B     | <i>ptc-Gal4, tub-Gal80TS/+; UAS-dlg-RNAi/ UAS-PTP10D-RNAi</i>                                              |
|        | C     | <i>ptc-Gal4, tub-Gal80TS/ UAS-Dcr2; UAS-dlg-RNAi/ UAS-PTP10D-RNAi</i>                                      |
|        | E     | <i>ptc-Gal4, tub-Gal80TS/+; +/+</i>                                                                        |
|        | F     | <i>ptc-Gal4, tub-Gal80TS/+; UAS-PTP10D-RNAi/+</i>                                                          |
|        | G     | <i>ptc-Gal4, tub-Gal80TS/ UAS-Dcr2; UAS-PTP10D-RNAi/+</i>                                                  |
|        | 2     | A                                                                                                          |
| B      |       | <i>eyFLP.1; Act&gt;y+&gt;Gal4, UAS-GFP/+; scrib1, FRT82b/ FRT82b, tub-Gal80</i>                            |
| C      |       | <i>eyFLP.1; Act&gt;y+&gt;Gal4, UAS-GFP/+; scrib1, FRT82b, UAS-PTP10D-RNAi/ FRT82b, tub-Gal80</i>           |
| F      |       | <i>eyFLP.1; Act&gt;y+&gt;Gal4, UAS-GFP/+; scrib1, FRT82b/ FRT82b, tub-Gal80</i>                            |
| G      |       | <i>eyFLP.1; Act&gt;y+&gt;Gal4, UAS-GFP/+; scrib1, FRT82b, UAS-PTP10D-RNAi/ FRT82b, tub-Gal80</i>           |
| H      |       | <i>UAS-Dcr2; eyFLP.5, Act&gt;y+&gt;Gal4, UAS-GFP/+; FRT82b/ FRT82b, tub-Gal80</i>                          |
| I      |       | <i>UAS-Dcr2; eyFLP.5, Act&gt;y+&gt;Gal4, UAS-GFP/+; scrib1, FRT82b/ FRT82b, tub-Gal80</i>                  |
| J      |       | <i>UAS-Dcr2; eyFLP.5, Act&gt;y+&gt;Gal4, UAS-GFP/+; scrib1, FRT82b, UAS-PTP10D-RNAi/ FRT82b, tub-Gal80</i> |
| M      |       | <i>UAS-Dcr2; eyFLP.5, Act&gt;y+&gt;Gal4, UAS-GFP/+; scrib1, FRT82b/ FRT82b, tub-Gal80</i>                  |
| N      |       | <i>UAS-Dcr2; eyFLP.5, Act&gt;y+&gt;Gal4, UAS-GFP/+; scrib1, FRT82b, UAS-PTP10D-RNAi/ FRT82b, tub-Gal80</i> |
| 3      | A     | <i>+/&gt;; eyFLP.5, Act&gt;y+&gt;Gal4, UAS-GFP/+; FRT82b/ FRT82b, tub-Gal80</i>                            |
|        | B     | <i>+/&gt;; eyFLP.5, Act&gt;y+&gt;Gal4, UAS-GFP/+; scrib1, FRT82b/ FRT82b, tub-Gal80</i>                    |
|        | C     | <i>PTP10D-1/&gt;; eyFLP.5, Act&gt;y+&gt;Gal4, UAS-GFP/+; scrib1, FRT82b/ FRT82b, tub-Gal80</i>             |
|        | D     | <i>+/&gt;; eyFLP.5, Act&gt;y+&gt;Gal4, UAS-GFP/+; FRT82b/ FRT82b, tub-Gal80</i>                            |
|        | E     | <i>+/&gt;; eyFLP.5, Act&gt;y+&gt;Gal4, UAS-GFP/+; scrib2, FRT82b/ FRT82b, tub-Gal80</i>                    |

|   |   |                                                                                                         |
|---|---|---------------------------------------------------------------------------------------------------------|
|   | F | <i>PTP10D-1/&gt;&gt;; eyFLP.5, Act&gt;y+&gt;Gal4, UAS-GFP/ +; scrib2, FRT82b/<br/>FRT82b, tub-Gal80</i> |
| 4 | A | <i>eyFLP.1; Act&gt;y+&gt;Gal4, UAS-GFP/ +; FRT82b/ FRT82b, tub-Gal80</i>                                |
|   | B | <i>eyFLP.1; Act&gt;y+&gt;Gal4, UAS-GFP/ +; scrib1, FRT82b/ FRT82b, tub-Gal80</i>                        |
|   | C | <i>eyFLP.1; Act&gt;y+&gt;Gal4, UAS-GFP/ +; scrib1, FRT82b, UAS-PTP10D-RNAi/<br/>FRT82b, tub-Gal80</i>   |
|   | E | <i>eyFLP.1; Act&gt;y+&gt;Gal4, UAS-GFP/ +; FRT82b/ FRT82b, tub-Gal80</i>                                |
|   | F | <i>eyFLP.1; Act&gt;y+&gt;Gal4, UAS-GFP/ +; scrib1, FRT82b/ FRT82b, tub-Gal80</i>                        |
|   | G | <i>eyFLP.1; Act&gt;y+&gt;Gal4, UAS-GFP/ +; scrib1, FRT82b, UAS-PTP10D-RNAi/<br/>FRT82b, tub-Gal80</i>   |
|   | I | <i>eyFLP.1; Act&gt;y+&gt;Gal4, UAS-GFP/ +; FRT82b/ FRT82b, tub-Gal80</i>                                |
|   | J | <i>eyFLP.1; Act&gt;y+&gt;Gal4, UAS-GFP/ +; scrib1, FRT82b/ FRT82b, tub-Gal80</i>                        |
|   | K | <i>eyFLP.1; Act&gt;y+&gt;Gal4, UAS-GFP/ +; scrib1, FRT82b, UAS-PTP10D-RNAi/<br/>FRT82b, tub-Gal80</i>   |
|   | M | <i>eyFLP.1; Act&gt;y+&gt;Gal4, UAS-GFP/ +; FRT82b/ FRT82b, tub-Gal80</i>                                |
|   | N | <i>eyFLP.1; Act&gt;y+&gt;Gal4, UAS-GFP/ +; scrib1, FRT82b/ FRT82b, tub-Gal80</i>                        |
|   | O | <i>eyFLP.1; Act&gt;y+&gt;Gal4, UAS-GFP/ +; scrib1, FRT82b, UAS-PTP10D-RNAi/<br/>FRT82b, tub-Gal80</i>   |
|   | Q | <i>eyFLP.1; Act&gt;y+&gt;Gal4, UAS-GFP/ +; FRT82b/ FRT82b, tub-Gal80</i>                                |
|   | R | <i>eyFLP.1; Act&gt;y+&gt;Gal4, UAS-GFP/ +; scrib1, FRT82b/ FRT82b, tub-Gal80</i>                        |
|   | S | <i>eyFLP.1; Act&gt;y+&gt;Gal4, UAS-GFP/ +; scrib1, FRT82b, UAS-PTP10D-RNAi/<br/>FRT82b, tub-Gal80</i>   |
|   | U | <i>eyFLP.1; Act&gt;y+&gt;Gal4, UAS-GFP/ +; FRT82b/ FRT82b, tub-Gal80</i>                                |
|   | V | <i>eyFLP.1; Act&gt;y+&gt;Gal4, UAS-GFP/ +; scrib1, FRT82b/ FRT82b, tub-Gal80</i>                        |
|   | W | <i>eyFLP.1; Act&gt;y+&gt;Gal4, UAS-GFP/ +; scrib1, FRT82b, UAS-PTP10D-RNAi/<br/>FRT82b, tub-Gal80</i>   |
| 5 | A | <i>eyFLP.1; Act&gt;y+&gt;Gal4, UAS-GFP/ +; FRT82b/ FRT82b, tub-Gal80</i>                                |
|   | B | <i>eyFLP.1; Act&gt;y+&gt;Gal4, UAS-GFP/ +; scrib1, FRT82b/ FRT82b, tub-Gal80</i>                        |
|   | C | <i>eyFLP.1; Act&gt;y+&gt;Gal4, UAS-GFP/ +; scrib1, FRT82b, UAS-PTP10D-RNAi/<br/>FRT82b, tub-Gal80</i>   |
|   | E | <i>eyFLP.1; Act&gt;y+&gt;Gal4, UAS-GFP/ +; FRT82b/ FRT82b, tub-Gal80</i>                                |
|   | F | <i>eyFLP.1; Act&gt;y+&gt;Gal4, UAS-GFP/ +; scrib1, FRT82b/ FRT82b, tub-Gal80</i>                        |

|    |   |                                                                                                 |
|----|---|-------------------------------------------------------------------------------------------------|
|    | G | <i>eyFLP.1; Act&gt;y+&gt;Gal4, UAS-GFP/+; scrib1, FRT82b, UAS-PTP10D-RNAi/FRT82b, tub-Gal80</i> |
|    | I | <i>eyFLP.1; Act&gt;y+&gt;Gal4, UAS-GFP/+; FRT82b/FRT82b, tub-Gal80</i>                          |
|    | J | <i>eyFLP.1; Act&gt;y+&gt;Gal4, UAS-GFP/+; scrib1, FRT82b/FRT82b, tub-Gal80</i>                  |
|    | K | <i>eyFLP.1; Act&gt;y+&gt;Gal4, UAS-GFP/+; scrib1, FRT82b, UAS-PTP10D-RNAi/FRT82b, tub-Gal80</i> |
| S1 | A | <i>eyFLP.1; Act&gt;y+&gt;Gal4, UAS-GFP/+; scrib1, FRT82b/FRT82b, tub-Gal80</i>                  |
|    | B | <i>eyFLP.1; Act&gt;y+&gt;Gal4, UAS-GFP/+; scrib1, FRT82b, UAS-PTP10D-RNAi/FRT82b, tub-Gal80</i> |
|    | C | <i>eyFLP.1; Act&gt;y+&gt;Gal4, UAS-GFP/+; scrib1, FRT82b/FRT82b, tub-Gal80</i>                  |
|    | D | <i>eyFLP.1; Act&gt;y+&gt;Gal4, UAS-GFP/+; scrib1, FRT82b, UAS-PTP10D-RNAi/FRT82b, tub-Gal80</i> |
| S2 | A | <i>FRT19a/ hsFLP, FRT19a, tub-Gal80; Act-Gal4, UAS-GFP/+; +/+</i>                               |
|    | B | <i>dlg-m52, FRT19a/ hsFLP, FRT19a, tub-Gal80; Act-Gal4, UAS-GFP/+; +/+</i>                      |
|    | C | <i>dlg-m52, FRT19a/ hsFLP, FRT19a, tub-Gal80; Act-Gal4, UAS-GFP/+; UAS-PTP10D-RNAi/+</i>        |
|    | E | <i>UAS-GFP, hsFLP; FRT40a/ tub-Gal80, FRT40a; tub-Gal4/+</i>                                    |
|    | F | <i>UAS-GFP, hsFLP; lgl-27S3, FRT40a/ tub-Gal80, FRT40a; tub-Gal4/+</i>                          |
|    | G | <i>UAS-GFP, hsFLP; lgl-27S3, FRT40a/ tub-Gal80, FRT40a; tub-Gal4/ UAS-PTP10D-RNAi</i>           |
|    | I | <i>FRT19a/ hsFLP, FRT19a, tub-Gal80; Act-Gal4, UAS-GFP/+; +/+</i>                               |
|    | J | <i>dlg-m52, FRT19a/ hsFLP, FRT19a, tub-Gal80; Act-Gal4, UAS-GFP/+; +/+</i>                      |
|    | K | <i>dlg-m52, FRT19a/ hsFLP, FRT19a, tub-Gal80; Act-Gal4, UAS-GFP/+; UAS-PTP10D-RNAi/+</i>        |
|    | M | <i>hsFLP; +/+; Act&gt;CD2&gt;Gal4, UAS-RFP/+</i>                                                |
|    | N | <i>hsFLP; UAS-dlg-RNAi/+; Act&gt;CD2&gt;Gal4, UAS-RFP/+</i>                                     |
|    | O | <i>hsFLP; UAS-dlg-RNAi/+; Act&gt;CD2&gt;Gal4, UAS-RFP/ UAS-PTP10D-RNAi</i>                      |
|    | Q | <i>hsFLP; UAS-dlg-RNAi/+; Act&gt;CD2&gt;Gal4, UAS-RFP/+</i>                                     |
|    | R | <i>hsFLP; +/+; Act&gt;CD2&gt;Gal4, UAS-RFP/+</i>                                                |
|    | S | <i>hsFLP; UAS-scrib-RNAi/ UAS-scrib-RNAi; Act&gt;CD2&gt;Gal4, UAS-RFP/+</i>                     |
|    | T | <i>hsFLP; UAS-scrib-RNAi/ UAS-scrib-RNAi; Act&gt;CD2&gt;Gal4, UAS-RFP/ UAS-PTP10D-RNAi</i>      |
| S3 | A | <i>+/+; tGPH/ tGPH</i>                                                                          |

|    |   |                                                                                             |
|----|---|---------------------------------------------------------------------------------------------|
|    | B | + / +; <i>tGPH/ tGPH</i>                                                                    |
|    | D | <i>ptc-Gal4, tub-Gal80TS/ +; + / +</i>                                                      |
|    | E | <i>ptc-Gal4, tub-Gal80TS/ +; UAS-dlg-RNAi/ +</i>                                            |
|    | F | <i>ptc-Gal4, tub-Gal80TS/ UAS-grnd-RNAi; UAS-dlg-RNAi/ +</i>                                |
|    | H | <i>ptc-Gal4, tub-Gal80TS/ +; + / +</i>                                                      |
|    | I | <i>ptc-Gal4, tub-Gal80TS/ +; UAS-dlg-RNAi/ +</i>                                            |
|    | J | <i>ptc-Gal4, tub-Gal80TS/ UAS-grnd-RNAi; UAS-dlg-RNAi/ +</i>                                |
|    | L | <i>ptc-Gal4, tub-Gal80TS/ +; + / +</i>                                                      |
|    | M | <i>ptc-Gal4, tub-Gal80TS/ +; UAS-dlg-RNAi/ +</i>                                            |
|    | N | <i>ptc-Gal4, tub-Gal80TS/ UAS-grnd-RNAi; UAS-dlg-RNAi/ +</i>                                |
|    | P | <i>ptc-Gal4, tub-Gal80TS/ +; + / +</i>                                                      |
|    | Q | <i>ptc-Gal4, tub-Gal80TS/ +; UAS-dlg-RNAi/ +</i>                                            |
|    | R | <i>ptc-Gal4, tub-Gal80TS/ UAS-grnd-RNAi; UAS-dlg-RNAi/ +</i>                                |
| S4 | A | <i>eyFLP.1; Act&gt;y+&gt;Gal4, UAS-GFP/ +; FRT82b/ FRT82b, tub-Gal80</i>                    |
|    | B | <i>eyFLP.1; Act&gt;y+&gt;Gal4, UAS-GFP/ +; scrib1, FRT82b/ FRT82b, tub-Gal80</i>            |
|    | C | <i>eyFLP.1; Act&gt;y+&gt;Gal4, UAS-GFP/ +; FRT82b/ FRT82b, tub-Gal80, sas-eld-4</i>         |
|    | D | <i>eyFLP.1; Act&gt;y+&gt;Gal4, UAS-GFP/ +; scrib1, FRT82b/ FRT82b, tub-Gal80, sas-eld-4</i> |
|    | G | <i>eyFLP.1; Act&gt;y+&gt;Gal4, UAS-GFP/ +; scrib1, FRT82b/ FRT82b, tub-Gal80</i>            |
|    | H | <i>eyFLP.1; Act&gt;y+&gt;Gal4, UAS-GFP/ +; scrib1, FRT82b/ FRT82b, tub-Gal80, sas-eld-4</i> |
